# Supplementary material for: Cinacalcet corrects hypercalcemia in mice with an inactivating Gα11 mutation
Source: PubMed Central journal article supplement (PMC5846897; doi:10.1172/jci.insight.96540), 2017-10-19
Supplement: jciinsight-2-96540-s001.pdf [file jciinsight-2-96540-s001.pdf]

Supplementary Table 1. *Gnal1* missense variants identified in ENU mutagenized mice.

| ENU mutation |                  | Frequency in population (%) <sup>a</sup> | Conservation <sup>b</sup> | Polyphen-2 prediction <sup>c</sup> | Location in $G\alpha_{11}$ <sup>d</sup>          |
|--------------|------------------|------------------------------------------|---------------------------|------------------------------------|--------------------------------------------------|
| Nucleotide   | Predicted Change |                                          |                           |                                    |                                                  |
| c.621C>T     | Gln127Stop       | 0                                        | 2/4                       | 0.9999<br>(Disease-causing)        | Helical domain<br>( $\alpha$ C-helix)            |
| c.637T>A     | Ile132Asn        | 0                                        | 4/4                       | 0.9999<br>(Disease-causing)        | Helical domain<br>( $\alpha$ C-helix)            |
| c.682G>A     | Arg147His        | 0                                        | 4/4                       | 0.9999<br>(Disease-causing)        | Helical domain<br>( $\alpha$ D- $\alpha$ E loop) |
| c.826A>G     | Asp195Gly        | 0                                        | 4/4                       | 0.9999<br>(Disease-causing)        | GTPase domain<br>( $\beta$ 2-strand)             |
| c.1048T>C    | Val269Ala        | 0                                        | 4/4                       | 0.9999<br>(Disease-causing)        | GTPase domain<br>( $\beta$ 5-strand)             |

<sup>a</sup>Frequency of variant in population derived from ExAc database (<http://exac.broadinstitute.org/>) (accessed June 2017), representing exomes from 60,706 unrelated individuals. <sup>b</sup>Conservation of WT residue in  $G\alpha_{11}$  orthologs from four species (human, chicken, xenopus, zebrafish). <sup>c</sup>Polyphen-2 scores predict the effect of amino acid substitutions based on sequence homology, protein databank structures, and pfam annotations (31). It gives a qualitative score of probably damaging, possibly damaging, benign, or unknown and quantitative scores are based on the probability that the change is damaging, i.e. the nearer to 0 the more benign. A mutation is classified as probably damaging if the score is  $>0.85$ , and possibly damaging if the score is  $>0.15$  (32).

<sup>d</sup>Location in  $G\alpha_{11}$  based on structural modeling using the published crystal structures of the highly related  $G\alpha_q$  protein (Protein Data Bank, accession number 4GNK (18)).

## Supplementary Figures

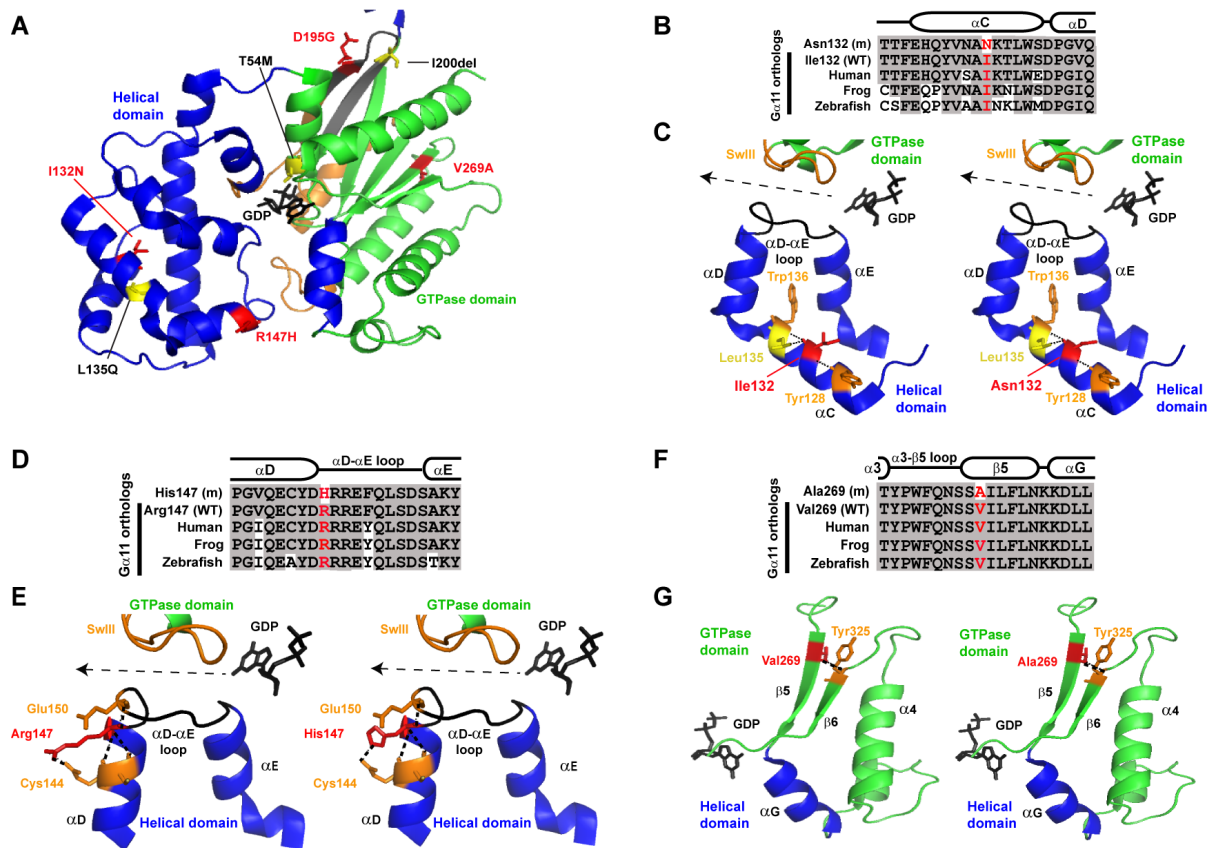

**Supplementary Figure 1. Structural characterization of the  $G\alpha_{11}$  variants identified in ENU mutagenized mice.** (A) Homology model of the GDP-bound  $G\alpha_{11}$  protein. The  $G\alpha$  helical (blue) and GTPase (green) domains, and bound GDP nucleotide (black) are shown. Switch regions I-III are shown in orange. Previously reported residues mutated in FHH2 (3, 10) patients are shown in yellow and the variants identified in ENU mutagenized mice are shown in red. (B) Multiple protein sequence alignment of  $G\alpha_{11}$  residues comprising the  $\alpha C$  and  $\alpha D$  helices of the  $G\alpha_{11}$  helical domain. Conserved residues are shown in gray. The WT (Ile, I) and mutant (m) (Asn, N) residues are shown in red. (C) Close-up view of the  $\alpha C$ - $\alpha E$  helices, which are located close to the SwIII region which facilitates GDP-GTP exchange (indicated by the black arrow). The Ile132 residue within  $\alpha C$  forms hydrogen bonds (broken lines) with three adjacent residues (shown in orange and yellow); however, the ENU Asn132 variant does not affect these bonds. (D) Multiple protein sequence alignment of  $G\alpha_{11}$  residues comprising the  $\alpha D$ - $\alpha E$  helices of the  $G\alpha_{11}$  helical domain. The WT (Arg, R) and mutant (m) (His, H) residues are shown in red. (E) Close-up view of the  $\alpha D$ - $\alpha E$  loop, located close to the SwIII region. The Arg147  $G\alpha_{11}$  residue forms polar contacts with adjacent Cys144 and Glu150 residues (orange); however, the ENU His147 variant has no effect on these bonds. (F) Multiple protein sequence alignment of  $G\alpha_{11}$  residues comprising the  $\beta 5$  strand and  $\alpha 3$  and  $\alpha G$  helices of  $G\alpha_{11}$ . The WT (Val, V) and mutant (m) (Ala, A) residues are shown in red. (G) Close-up view of the  $\alpha 4$  helix and  $\beta 5$ - $\beta 6$  strands of the  $G\alpha_{11}$  GTPase domain. The Val269  $G\alpha_{11}$  residue, located in the  $\beta 5$  strand forms a hydrogen bond with the Tyr325 residue on  $\beta 6$ , which is not affected by the ENU Ala269 variant.

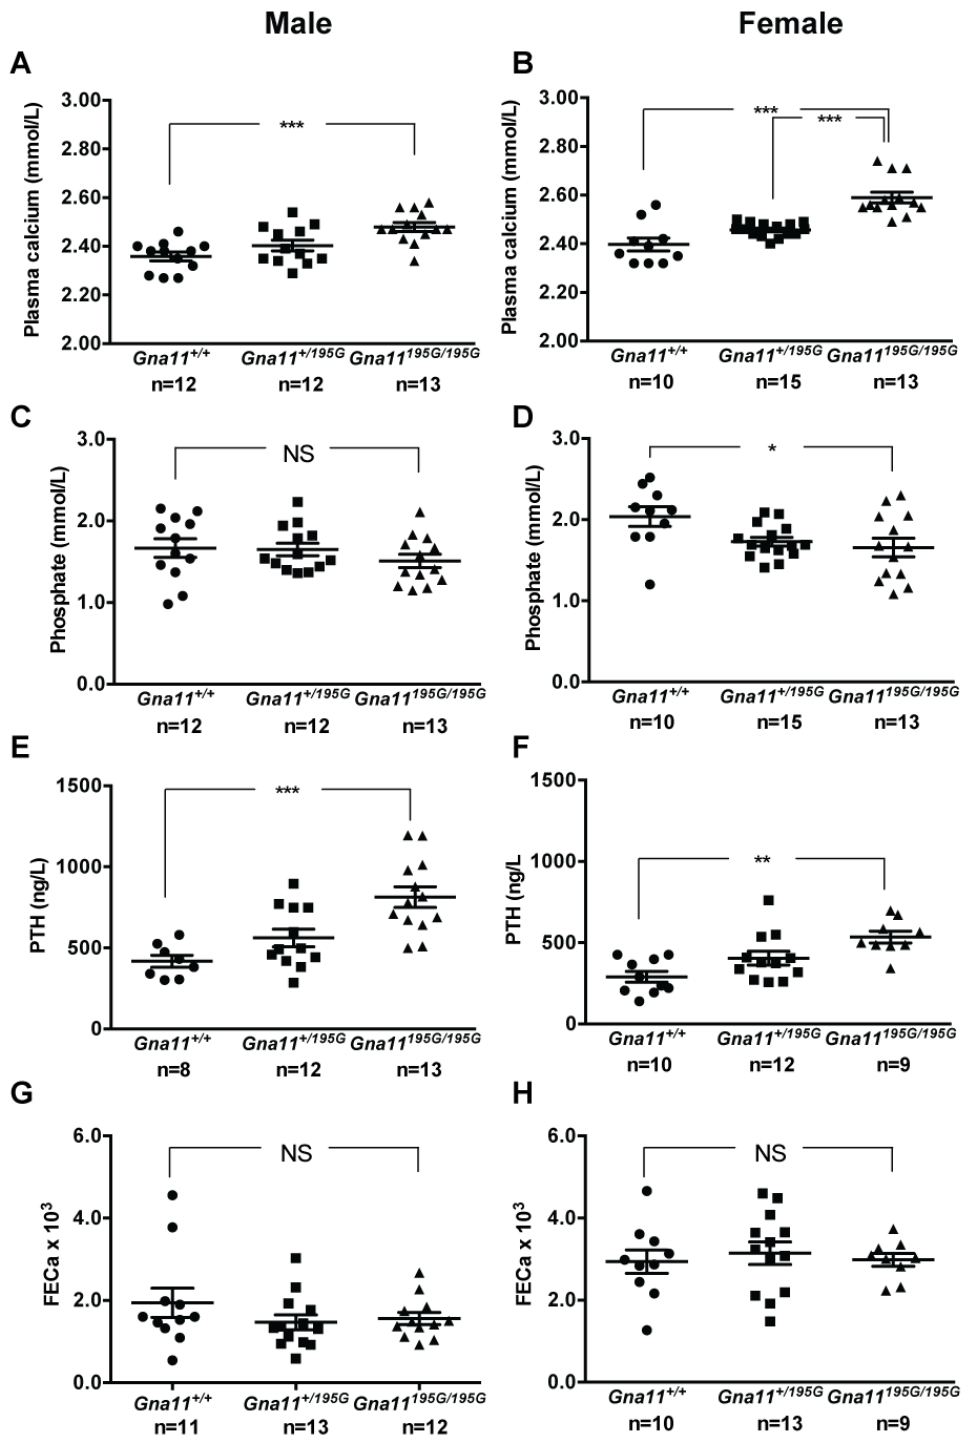

**Supplementary Figure 2. Calcitropic phenotype of male and female *Gna11*<sup>+/+</sup>, *Gna11*<sup>+/<sup>195G</sup></sup> and *Gna11*<sup>195G/195G</sup> mice.** (A-B) plasma adjusted-calcium concentrations, (C-D) plasma phosphate concentrations, (E-F) plasma PTH concentrations, and (G-H) fractional excretion of calcium (FECa) of male and female *Gna11*<sup>+/+</sup> (circles), *Gna11*<sup>+/<sup>195G</sup></sup> (squares) and *Gna11*<sup>195G/195G</sup> (triangles) mice. Mean ± SEM values for the respective groups are indicated by the solid bars. A Kruskal-Wallis test followed by Dunn's test for non-parametric pairwise multiple comparisons were used for analysis of A-H. \*p<0.05, \*\*p<0.01, \*\*\*p<0.001. NS, non-significant.

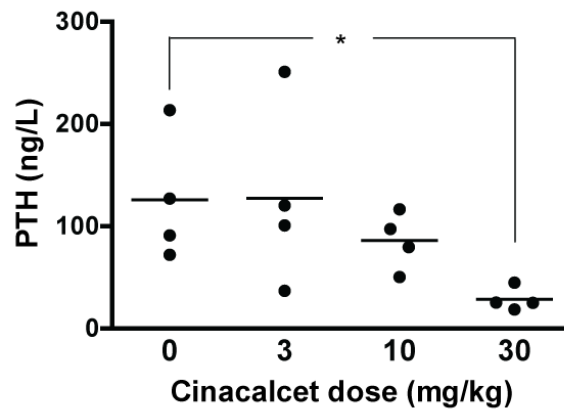

**Supplementary Figure 3. Effect of a range of oral cinacalcet doses on plasma PTH concentrations at 2h in WT (*Gna11*<sup>+/+</sup>) mice.** Filled circles represent individual WT mice (N=4 mice per dose). Mean±SEM values for the respective groups are indicated by solid bars. Statistical analysis was undertaken using a Kruskal-Wallis test followed by Dunn's test for non-parametric pairwise multiple comparisons. \*p<0.05.

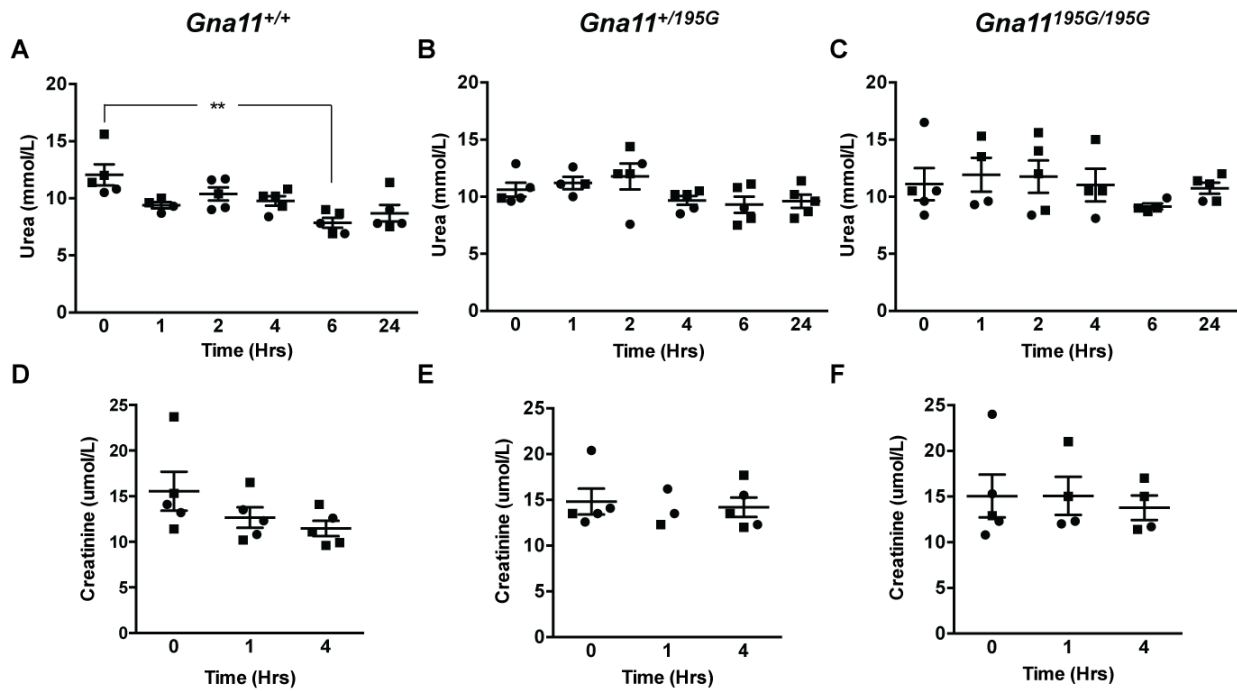

**Supplementary Figure 4. Effect of 30 mg/kg cinacalcet on plasma urea and creatinine of *Gna11*<sup>+/+</sup>, *Gna11*<sup>+/195G</sup> and *Gna11*<sup>195G/195G</sup> mice.** (A-C) plasma urea concentrations are shown at 0, 1, 2, 4, 6 and 24h, and (D-F) plasma creatinine concentrations are shown at 0, 1 and 4h following oral gavage administration of a single 30mg/kg cinacalcet dose. Mean±SEM values for the respective groups are indicated by solid bars. N=3-5 mice per study time-point. Squares, males; circles, females. A Kruskal-Wallis test followed by Dunn's test for non-parametric pairwise multiple comparisons were used for analysis of A-F. \*\*p<0.01.
